# Supplementary material for: Preventing unscheduled hospitalisations from asthma: a retrospective cohort study using routine primary and secondary care data in the UK (The PUSH-Asthma Study)—protocol paper
Source: HighWire-hosted journal article supplement (doi:10.1136/bmjopen-2021-058356), 2022-08-01
Supplement: bmjopen-2021-058356supp001_data_supplement.pdf [file bmjopen-2021-058356supp001_data_supplement.pdf]

**List of Appendices****Appendix 1: Asthma code list**

| <b>CPRD AURUM MEDCODES</b> | <b>DESCRIPTION</b>                                              | <b>READ CODE</b> | <b>SNOMED-CT CODE</b> |
|----------------------------|-----------------------------------------------------------------|------------------|-----------------------|
| 95786019                   | Occupational asthma                                             | 173c.00          | 57607007              |
| 301485011                  | Asthma                                                          | H33..00          | 195967001             |
| 338238011                  | Brittle asthma                                                  | H334.00          | 225057002             |
| 396114013                  | Intrinsic asthma                                                | H331.00          | 266361008             |
| 456163018                  | Asthma - currently active                                       | 663j.00          | 312453004             |
| 1208969012                 | Mild asthma                                                     | 663V100          | 370218001             |
| 1483199016                 | Allergic asthma                                                 | H330.11          | 389145006             |
| 1488421017                 | Asthma annual review                                            | 66YJ.00          | 394700004             |
| 1488436019                 | Asthma medication review                                        | 8B3j.00          | 394720003             |
| 885291000006115            | Extrinsic asthma - atopy                                        | H330.99          | 389145006             |
| 955631000006116            | Occupational asthma                                             | null             | 955631000006100       |
| 2010041000006110           | Acute non-infective exacerbation of asthma                      | null             | 2010041000006100      |
| 216186011                  | Asthma accident and emergency attendance since last visit       | 663m.00          | 708373002             |
| 264565016                  | Emergency asthma admission since last appointment               | 663d.00          | 708358003             |
| 301508013                  | Intrinsic asthma NOS                                            | H331z00          | 266361008             |
| 350149018                  | Late-onset asthma                                               | H33z200          | 233679003             |
| 350151019                  | Extrinsic asthma with asthma attack                             | H330111          | 708093000             |
| 409865018                  | Asthma attack NOS                                               | H33z111          | 708038006             |
| 655601000006113            | Exercise induced asthma                                         | 173A.00          | 31387002              |
| 655611000006111            | Exercise induced asthma                                         | H33zz11          | 31387002              |
| 660351000006118            | Extrinsic (atopic) asthma                                       | H330.00          | 389145006             |
| 419211018                  | Acute exacerbation of asthma                                    | H333.00          | 708038006             |
| 145961000006117            | Severe asthma attack                                            | H33z011          | 708090002             |
| 396118011                  | Status asthmaticus NOS                                          | H33z000          | 734904007             |
| 283550015                  | Emergency admission, asthma                                     | 8H2P.00          | 183478001             |
| 12485061000006100          | Emergency admission, asthma                                     | null             | 183478001             |
| 8465401000006110           | Life threatening acute exacerbation of non-allergic asthma      | null             | 1086711000000100      |
| 6720721000006110           | Asthmatic bronchitis                                            | null             | 405944004             |
| 7628271000006110           | Acute exacerbation of extrinsic asthma                          | null             | 708093000             |
| 3435971000006110           | Industrial asthma                                               | null             | 57607007              |
| 3005801000006110           | EIA - Exercise-induced asthma                                   | null             | 31387002              |
| 4723761000006110           | Emergency hospital admission for asthma                         | null             | 183478001             |
| 7627241000006110           | Acute exacerbation of asthma                                    | null             | 708038006             |
| 7628191000006110           | Acute severe exacerbation of asthma                             | null             | 708090002             |
| 8465381000006110           | Life threatening acute exacerbation of extrinsic asthma         | null             | 1086701000000100      |
| 5492441000006110           | Non-allergic asthma                                             | null             | 266361008             |
| 7628281000006110           | Acute exacerbation of immunoglobulin E-mediated allergic asthma | null             | 708093000             |
| 7030341000006110           | IgE mediated allergic asthma                                    | null             | 424643009             |

|                   |                                               |          |                  |
|-------------------|-----------------------------------------------|----------|------------------|
| 7030351000006110  | Immunoglobulin E-mediated allergic asthma     | null     | 424643009        |
| 3005811000006110  | Exercise induced asthma                       | null     | 31387002         |
| 4781531000006110  | Asthmatic                                     | null     | 195967001        |
| 6512381000006110  | Atopic asthma                                 | null     | 389145006        |
| 2009981000006110  | Difficult asthma                              | null     | 2009981000006100 |
| 1821521000006110  | Occasional asthma exacerbations               | null     | 1821521000006100 |
| 1208970013        | Moderate asthma                               | 663V200  | 370219009        |
| 1208971012        | Occasional asthma                             | 663V000  | 370220003        |
| 350153016         | Hay fever with asthma                         | H330011  | 233683003        |
| 301509017         | Mixed asthma                                  | H332.00  | 195977004        |
| 301499010         | Extrinsic asthma NOS                          | H330z00  | 424643009        |
| 350152014         | Allergic asthma NEC                           | H33zz12  | 389145006        |
| 11903851000006100 | Severe asthma attack                          | null     | 708038006        |
| 7030311000006110  | IgE-mediated allergic asthma                  | null     | 424643009        |
| 7030321000006110  | IgE mediated asthma                           | null     | 424643009        |
| 2240591000000110  | Chronic asthma with fixed airflow obstruction | H335.00  | 866881000000101  |
| 1208972017        | Severe asthma                                 | 663V300  | 370221004        |
| 1488422012        | Asthma follow-up                              | 66YK.00  | 394701000        |
| 301450011         | Chronic asthmatic bronchitis                  | H312000  | 195949008        |
| 301480018         | Bronchial asthma                              | H33..11  | 195967001        |
| 264541019         | Asthma causing night waking                   | 663N000  | 170632009        |
| 264544010         | Asthma not disturbing sleep                   | 663O.00  | 170635006        |
| 5054341000006110  | Late-onset asthma                             | null     | 233679003        |
| 264550017         | Asthma management plan given                  | 663U.00  | 406162001        |
| 301511014         | Asthma unspecified                            | H33z.00  | 195967001        |
| 2117771000000110  | Asthma self-management plan agreed            | 661M100  | 811921000000103  |
| 2010031000006110  | Acute infective exacerbation of asthma        | null     | 2010031000006100 |
| 1780388018        | Asthma confirmed                              | 1O2..00  | 401193004        |
| 396119015         | Asthma attack                                 | H33z100  | 708038006        |
| 350148014         | Late onset asthma                             | H331.11  | 233679003        |
| 264568019         | Asthma severely restricts exercise            | 6.63E100 | 170657004        |
| 350156012         | Intrinsic asthma with asthma attack           | H331111  | 708094006        |
| 396120014         | Asthma NOS                                    | H33zz00  | 195967001        |
| 98546013          | Intrinsic asthma with status asthmaticus      | H331100  | 1086711000000100 |
| 817361000006114   | Hay fever with asthma                         | H330.13  | 233683003        |
